# Supplementary material for: Epithelial coxsackievirus adenovirus receptor promotes house dust mite-induced lung inflammation
Source: PubMed Central journal article supplement (PMC9613683; doi:10.1038/s41467-022-33882-w), 2022-10-27
Supplement: 41467_2022_33882_MOESM3_ESM.pdf [file 41467_2022_33882_MOESM3_ESM.pdf]

**Supplementary Data 1:** Proteins identified in complex with CAR by BioID

Excel spreadsheet detailing the results of BioID analysis of CAR-BirA expressing 16HBE cells. Full dataset is provided (tab: BioID enriched proteins') and the Top 100 (tab: 'Top 100") ranked by iBAQ CAR\_BioID\_Control (log2 Ratio) values.
